# Supplementary material for: Effectiveness of Influenza Vaccination and Early Antiviral Treatment in Reducing Pneumonia Risk in Severe Influenza Cases
Source: MDPI journal article supplement (doi:10.3390/vaccines12020173), 2024-02-07
Supplement: s1 [file s1]

**Table S1.** Patients 18-64 years with severe influenza with and without pneumonia during the 2010/2011-2019/2020 flu seasons in Catalonia (Spain).

|                                                  | With pneumonia<br>(N=1314) | Without pneumonia<br>(N=572) | OR (95%CI)       | aOR (95% CI)     |
|--------------------------------------------------|----------------------------|------------------------------|------------------|------------------|
| Influenza vaccination                            |                            |                              |                  |                  |
| Yes                                              | 133 (10.3%)                | 79 (14.3%)                   | 0.69 (0.51-0.93) | 0.95 (0.68-1.34) |
| No                                               | 1156 (89.7%)               | 473 (85.7%)                  | Ref.             | Ref.             |
| Sex                                              |                            |                              |                  |                  |
| Female                                           | 555 (42.2%)                | 255 (44.6%)                  | 0.91 (0.75-1.11) |                  |
| Male                                             | 759 (57.8%)                | 317 (55.4%)                  | Ref.             |                  |
| ICU admission                                    |                            |                              |                  |                  |
| Yes                                              | 496 (37.7%)                | 179 (31.3%)                  | 1.33 (1.08-1.64) |                  |
| No                                               | 818 (62.3%)                | 393 (68.7%)                  | Ref.             |                  |
| Death                                            |                            |                              |                  |                  |
| Yes                                              | 118 (9.0%)                 | 35 (6.1%)                    | 1.51 (1.02-2.24) | 1.70 (1.08-2.68) |
| No                                               | 1196 (91.0%)               | 537 (93.9%)                  | Ref.             | Ref.             |
| ≥1 comorbidities                                 |                            |                              |                  |                  |
| Yes                                              | 794 (60.4%)                | 438 (76.6%)                  | 0.47 (0.37-0.58) |                  |
| No                                               | 520 (39.6%)                | 134 (23.4%)                  | Ref.             |                  |
| COPD                                             |                            |                              |                  |                  |
| Yes                                              | 179 (13.7%)                | 152 (27.0%)                  | 0.43 (0.34-0.55) | 0.44 (0.34-0.58) |
| No                                               | 1132 (86.3%)               | 412 (73.0%)                  | Ref.             | Ref.             |
| Obesity                                          |                            |                              |                  |                  |
| Yes                                              | 116 (8.9%)                 | 90 (16.0%)                   | 0.51 (0.38-0.69) | 0.53 (0.38-0.74) |
| No                                               | 1189 (91.1%)               | 473 (84.0%)                  | Ref.             | Ref.             |
| Diabetes                                         |                            |                              |                  |                  |
| Yes                                              | 207 (15.8%)                | 105 (18.6%)                  | 0.82 (0.64-1.07) |                  |
| No                                               | 1099 (84.2%)               | 460 (81.4%)                  | Ref.             |                  |
| CKD                                              |                            |                              |                  |                  |
| Yes                                              | 97 (7.4%)                  | 45 (7.9%)                    | 0.93 (0.64-1.34) |                  |
| No                                               | 1213 (92.6%)               | 523 (92.1%)                  | Ref.             |                  |
| Immunodeficiency                                 |                            |                              |                  |                  |
| Yes                                              | 265 (20.3%)                | 111 (19.7%)                  | 1.04 (0.81-1.33) |                  |
| No                                               | 1043 (79.7%)               | 453 (80.3%)                  | Ref.             |                  |
| CVD                                              |                            |                              |                  |                  |
| Yes                                              | 195 (14.9%)                | 93 (16.5%)                   | 0.88 (0.68-1.16) |                  |
| No                                               | 1116 (85.1%)               | 471 (83.5%)                  | Ref.             |                  |
| CLD                                              |                            |                              |                  |                  |
| Yes                                              | 109 (8.3%)                 | 46 (8.2%)                    | 1.02 (0.71-1.46) |                  |
| No                                               | 1199 (91.7%)               | 516 (91.8%)                  | Ref.             |                  |
| Antiviral treatment                              |                            |                              |                  |                  |
| Yes                                              | 1247 (95.0%)               | 529 (92.8%)                  | 1.46 (0.98-2.19) |                  |
| No                                               | 66 (5.0%)                  | 41 (7.2%)                    | Ref.             |                  |
| Antiviral treatment<br>≤48h before symptom onset | 330 (26.0%)                | 221 (40.3%)                  | Ref.             | Ref.             |
| >48h after symptom onset                         | 873 (68.8%)                | 286 (52.2%)                  | 2.04 (1.65-2.54) | 1.91 (1.51-2.41) |
| No                                               | 66 (5.2%)                  | 41 (7.5%)                    | 1.08 (0.70-1.65) | 0.84 (0.53-1.35) |
| Hospital stay, days                              |                            |                              |                  |                  |
| 0-14                                             | 906 (69.1%)                | 412 (72.2%)                  | 0.86 (0.69-1.07) | 0.84 (0.66-1.08) |
| >14                                              | 406 (30.9%)                | 159 (27.8%)                  | Ref.             | Ref.             |

|                      |              |             |                   |                  |
|----------------------|--------------|-------------|-------------------|------------------|
| ARDS                 |              |             |                   |                  |
| Yes                  | 461 (35.7%)  | 315 (55.5%) | 0.44 (0.36-0.54)  |                  |
| No                   | 830 (64.3%)  | 253 (44.5%) | Ref.              |                  |
| Multiorgan failure   |              |             |                   |                  |
| Yes                  | 126 (9.8%)   | 33 (5.8%)   | 1.76 (1.18-2.61)  |                  |
| No                   | 1158 (90.2%) | 533 (94.2%) | Ref.              |                  |
| Influenza virus type |              |             |                   |                  |
| A                    | 1071 (81.5%) | 486 (85.0%) | Ref.              |                  |
| B                    | 242 (18.4%)  | 84 (14.7%)  | 1.31 (0.99-1.71)  |                  |
| C                    | 1 (0.1%)     | 2 (0.3%)    | 0.23 (0.02-2.51)  |                  |
| Influenza season     |              |             |                   |                  |
| 2010-11              | 97 (7.4%)    | 31 (5.4%)   | 3.04 (1.86-4.96)  | 2.07 (1.20-3.54) |
| 2011-12              | 32 (2.4%)    | 7 (1.2%)    | 4.44 (1.87-10.52) | 3.65 (1.47-9.08) |
| 2012-13              | 45 (3.4%)    | 15 (2.6%)   | 2.91 (1.52-5.56)  | 2.19 (1.08-4.45) |
| 2013-14              | 122 (9.3%)   | 46 (8.0%)   | 2.57 (1.66-3.99)  | 2.22 (1.35-3.64) |
| 2014-15              | 126 (9.6%)   | 22 (3.8%)   | 5.56 (3.27-9.45)  | 4.02 (2.27-7.12) |
| 2015-16              | 209 (15.9%)  | 51 (8.9%)   | 3.98 (2.63-6.01)  | 3.20 (2.01-5.08) |
| 2016-17              | 72 (5.5%)    | 38 (6.6%)   | 1.84 (1.14-2.98)  | 1.62 (0.93-2.82) |
| 2017-18              | 280 (21.3%)  | 112 (19.6%) | 2.43 (1.70-3.46)  | 1.91 (1.28-2.86) |
| 2018-19              | 230 (17.5%)  | 152 (26.6%) | 1.47 (1.04-2.07)  | 1.10 (0.74-1.64) |
| 2019-20              | 101 (7.7%)   | 98 (17.1%)  | Ref.              | Ref.             |

Abbreviations: ARDS: acute respiratory distress syndrome. CI: confidence interval. CKD: chronic kidney disease. CLD: chronic liver disease. COPD: chronic obstructive pulmonary disease. CVD: cardiovascular disease. ICU: intensive care unit. OR: odds ratio.

**Supplementary Table S2.** Patients 65-74 years with severe influenza with and without pneumonia during the 2010/2011-2019/2020 flu seasons in Catalonia (Spain).

|                       | With pneumonia<br>(N=643) | Without pneumonia<br>(N=409) | OR (95%CI)       | aOR (95% CI)     |
|-----------------------|---------------------------|------------------------------|------------------|------------------|
| Influenza vaccination |                           |                              |                  |                  |
| Yes                   | 218 (34.2%)               | 152 (38.3%)                  | 0.84 (0.65-1.09) | 0.94 (0.71-1.25) |
| No                    | 419 (65.8%)               | 245 (61.7%)                  | Ref.             | Ref.             |
| Sex                   |                           |                              |                  |                  |
| Female                | 241 (37.5%)               | 143 (35.0%)                  | 1.12 (0.86-1.44) |                  |
| Male                  | 402 (62.5%)               | 266 (65.0%)                  | Ref.             |                  |
| ICU admission         |                           |                              |                  |                  |
| Yes                   | 171 (26.6%)               | 78 (19.1%)                   | 1.54 (1.14-2.08) | 1.42 (1.01-2.01) |
| No                    | 472 (73.4%)               | 331 (80.9%)                  | Ref.             | Ref.             |
| Death                 |                           |                              |                  |                  |
| Yes                   | 102 (15.9%)               | 43 (10.5%)                   | 1.60 (1.10-2.35) | 1.41 (0.92-2.17) |
| No                    | 541 (84.1%)               | 366 (89.5%)                  | Ref.             | Ref.             |
| ≥1 comorbidities      |                           |                              |                  |                  |
| Yes                   | 533 (82.9%)               | 363 (88.8%)                  | 0.61 (0.42-0.89) |                  |
| No                    | 110 (17.1%)               | 46 (11.2%)                   | Ref.             |                  |
| COPD                  |                           |                              |                  |                  |
| Yes                   | 210 (32.7%)               | 176 (43.0%)                  | 0.64 (0.50-0.83) | 0.63 (0.48-0.84) |
| No                    | 433 (67.3%)               | 233 (57.0%)                  | Ref.             | Ref.             |
| Obesity               |                           |                              |                  |                  |
| Yes                   | 61 (9.6%)                 | 56 (13.7%)                   | 0.67 (0.45-0.98) | 0.75 (0.57-0.99) |
| No                    | 574 (90.4%)               | 352 (86.3%)                  | Ref.             | Ref.             |
| Diabetes              |                           |                              |                  |                  |

|                               |             |             |                    |                   |
|-------------------------------|-------------|-------------|--------------------|-------------------|
| Yes                           | 214 (33.3%) | 154 (37.9%) | 0.82 (0.63-1.06)   |                   |
| No                            | 429 (66.7%) | 252 (62.1%) | Ref.               |                   |
| CKD                           |             |             |                    |                   |
| Yes                           | 99 (15.4%)  | 69 (16.9%)  | 0.89 (0.64-1.25)   |                   |
| No                            | 544 (84.6%) | 339 (83.1%) | Ref.               |                   |
| Immunodeficiency              |             |             |                    |                   |
| Yes                           | 166 (25.8%) | 85 (20.8%)  | 1.32 (0.98-1.78)   |                   |
| No                            | 477 (74.2%) | 323 (79.2%) | Ref.               |                   |
| CVD                           |             |             |                    |                   |
| Yes                           | 234 (36.4%) | 158 (38.7%) | 0.91 (0.70-1.17)   |                   |
| No                            | 408 (63.6%) | 250 (61.3%) | Ref.               |                   |
| CLD                           |             |             |                    |                   |
| Yes                           | 41 (6.4%)   | 24 (5.9%)   | 1.09 (0.65-1.84)   |                   |
| No                            | 599 (93.6%) | 383 (94.1%) | Ref.               |                   |
| Antiviral treatment           |             |             |                    |                   |
| Yes                           | 611 (95.0%) | 390 (95.4%) | 0.93 (0.52-1.66)   |                   |
| No                            | 32 (5.0%)   | 19 (4.6%)   | Ref.               |                   |
| Antiviral treatment           |             |             |                    |                   |
| ≤48h before symptom onset     | 216 (34.4%) | 158 (40.3%) | Ref.               |                   |
| >48h after symptom onset      | 380 (60.5%) | 215 (54.8%) | 1.29 (0.99-1.68)   |                   |
| No                            | 32 (5.1%)   | 19 (4.8%)   | 1.23 (0.67-2.25)   |                   |
| Length of hospital stay, days |             |             |                    |                   |
| 0-14                          | 438 (68.2%) | 287 (70.2%) | 0.91 (0.70-1.20)   |                   |
| >14                           | 204 (31.8%) | 122 (29.8%) | Ref.               |                   |
| ARDS                          |             |             |                    |                   |
| Yes                           | 207 (33.1%) | 253 (62.9%) | 0.29 (0.22-0.38)   |                   |
| No                            | 419 (66.9%) | 149 (37.1%) | Ref.               |                   |
| Multiorgan failure            |             |             |                    |                   |
| Yes                           | 68 (11.0%)  | 28 (7.0%)   | 1.64 (1.04-2.60)   |                   |
| No                            | 553 (89.0%) | 374 (93.0%) | Ref.               |                   |
| Influenza virus type          |             |             |                    |                   |
| A                             | 483 (75.1%) | 336 (82.2%) | Ref.               |                   |
| B                             | 160 (24.9%) | 73 (17.8%)  | 1.52 (1.12-2.08)   |                   |
| C                             | -           | -           |                    |                   |
| Influenza season              |             |             |                    |                   |
| 2010-11                       | 18 (2.8%)   | 2 (0.5%)    | 10.76 (2.38-48.60) | 6.54 (1.41-30.42) |
| 2011-12                       | 18 (2.8%)   | 7 (1.7%)    | 3.08 (1.19-7.94)   | 2.86 (1.08-7.63)  |
| 2012-13                       | 15 (2.3%)   | 6 (1.5%)    | 2.99 (1.08-8.27)   | 2.21 (0.78-6.38)  |
| 2013-14                       | 31 (4.8%)   | 23 (5.6%)   | 1.61 (0.84-3.10)   | 1.49 (0.72-3.10)  |
| 2014-15                       | 53 (8.2%)   | 19 (4.6%)   | 3.34 (1.76-6.34)   | 2.87 (1.47-5.60)  |
| 2015-16                       | 103 (16.0%) | 32 (7.8%)   | 3.85 (2.24-6.63)   | 3.34 (1.88-5.92)  |
| 2016-17                       | 68 (10.6%)  | 50 (12.2%)  | 1.63 (0.97-2.74)   | 1.49 (0.84-2.63)  |
| 2017-18                       | 170 (26.4%) | 96 (23.5%)  | 2.12 (1.35-3.32)   | 1.99 (1.23-3.23)  |
| 2018-19                       | 116 (18.0%) | 113 (27.6%) | 1.23 (0.78-1.93)   | 1.12 (0.68-1.83)  |
| 2019-20                       | 51 (7.9%)   | 61 (14.9%)  | Ref.               | Ref.              |

Abbreviations: ARDS: acute respiratory distress syndrome. CI: confidence interval. CKD: chronic kidney disease. CLD: chronic liver disease. COPD: chronic obstructive pulmonary disease. CVD: cardiovascular disease. ICU: intensive care unit. OR: odds ratio.

**Supplementary Table S3.** Patients ≥75 years with severe influenza with and without pneumonia during the 2010/2011-2019/2020 flu seasons in Catalonia (Spain).

|                               | With pneumonia<br>(N=1267) | Without pneumonia<br>(N=875) | OR (95%CI)       | aOR (95% CI)     |
|-------------------------------|----------------------------|------------------------------|------------------|------------------|
| Influenza vaccination         |                            |                              |                  |                  |
| Yes                           | 609 (48.9%)                | 441 (51.5%)                  | 0.90 (0.76-1.07) | 0.84 (0.70-1.02) |
| No                            | 637 (51.1%)                | 415 (48.5%)                  | Ref.             | Ref.             |
| Sex                           |                            |                              |                  |                  |
| Female                        | 669 (52.8%)                | 413 (47.2%)                  | 0.80 (0.67-0.95) | 0.71 (0.58-0.87) |
| Male                          | 598 (47.2%)                | 462 (52.8%)                  | Ref.             | Ref.             |
| ICU admission                 |                            |                              |                  |                  |
| Yes                           | 164 (12.9%)                | 91 (10.4%)                   | 1.28 (0.98-1.68) | 1.28 (0.94-1.75) |
| No                            | 1103 (87.1%)               | 784 (89.6%)                  | Ref.             | Ref.             |
| Death                         |                            |                              |                  |                  |
| Yes                           | 231 (18.2%)                | 157 (17.9%)                  | 1.02 (0.82-1.28) |                  |
| No                            | 1036 (81.8%)               | 718 (82.1%)                  | Ref.             |                  |
| ≥1 comorbidities              |                            |                              |                  |                  |
| Yes                           | 1079 (85.2%)               | 741 (84.7%)                  | 1.04 (0.82-1.32) |                  |
| No                            | 188 (14.8%)                | 134 (15.3%)                  | Ref.             |                  |
| COPD                          |                            |                              |                  |                  |
| Yes                           | 336 (26.6%)                | 261 (29.9%)                  | 0.85 (0.70-1.03) | 0.71 (0.57-0.89) |
| No                            | 926 (73.4%)                | 612 (70.1%)                  | Ref.             | Ref.             |
| Obesity                       |                            |                              |                  |                  |
| Yes                           | 66 (5.4%)                  | 63 (7.3%)                    | 0.72 (0.51-1.03) | 0.65 (0.44-0.96) |
| No                            | 1164 (94.6%)               | 803 (92.7%)                  | Ref.             | Ref.             |
| Diabetes                      |                            |                              |                  |                  |
| Yes                           | 403 (32.1%)                | 256 (29.6%)                  | 1.12 (0.93-1.35) |                  |
| No                            | 854 (67.9%)                | 609 (70.4%)                  | Ref.             |                  |
| CKD                           |                            |                              |                  |                  |
| Yes                           | 314 (24.9%)                | 231 (26.4%)                  | 0.92 (0.76-1.12) |                  |
| No                            | 949 (75.1%)                | 643 (73.6%)                  | Ref.             |                  |
| Immunodeficiency              |                            |                              |                  |                  |
| Yes                           | 172 (13.7%)                | 109 (12.6%)                  | 1.10 (0.85-1.42) |                  |
| No                            | 1088 (86.3%)               | 759 (87.4%)                  | Ref.             |                  |
| CVD                           |                            |                              |                  |                  |
| Yes                           | 622 (49.2%)                | 407 (46.7%)                  | 1.11 (0.93-1.32) |                  |
| No                            | 641 (50.8%)                | 465 (53.3%)                  | Ref.             |                  |
| CLD                           |                            |                              |                  |                  |
| Yes                           | 47 (3.7%)                  | 27 (3.1%)                    | 1.21 (0.75-1.95) |                  |
| No                            | 1214 (96.3%)               | 842 (96.9%)                  | Ref.             |                  |
| Antiviral treatment           |                            |                              |                  |                  |
| Yes                           | 1136 (90.1%)               | 822 (94.2%)                  | 0.56 (0.40-0.79) |                  |
| No                            | 125 (9.9%)                 | 51 (5.8%)                    | Ref.             |                  |
| Antiviral treatment           |                            |                              |                  |                  |
| ≤48h before symptom onset     | 381 (31.4%)                | 387 (46.5%)                  | Ref.             | Ref.             |
| >48h after symptom onset      | 708 (58.3%)                | 394 (47.4%)                  | 1.82 (1.51-2.20) | 1.73 (1.41-2.12) |
| No                            | 125 (10.3%)                | 51 (6.1%)                    | 2.49 (1.75-3.55) | 2.05 (1.40-2.99) |
| Length of hospital stay, days |                            |                              |                  |                  |
| 0-14                          | 980 (77.4%)                | 630 (72.0%)                  | 1.33 (1.09-1.62) | 1.33 (1.06-1.67) |
| >14                           | 286 (22.6%)                | 245 (28.0%)                  | Ref.             | Ref.             |
| ARDS                          |                            |                              |                  |                  |
| Yes                           | 361 (29.4%)                | 573 (65.9%)                  | 0.22 (0.18-0.26) |                  |
| No                            | 866 (70.6%)                | 297 (34.1%)                  | Ref.             |                  |
| Multiorgan failure            |                            |                              |                  |                  |

|                      |              |             |                  |                  |
|----------------------|--------------|-------------|------------------|------------------|
| Yes                  | 93 (7.6%)    | 84 (9.7%)   | 0.77 (0.56-1.05) |                  |
| No                   | 1128 (92.4%) | 783 (90.3%) | Ref.             |                  |
| Influenza virus type |              |             |                  |                  |
| A                    | 964 (76.1%)  | 688 (78.6%) | Ref.             |                  |
| B                    | 303 (23.9%)  | 186 (21.3%) | 1.16 (0.94-1.43) |                  |
| C                    | 0 (0%)       | 1 (0.1%)    | -                |                  |
| Influenza season     |              |             |                  |                  |
| 2010-11              | 12 (0.9%)    | 8 (0.9%)    | 1.77 (0.69-4.53) | 1.64 (0.60-4.51) |
| 2011-12              | 44 (3.5%)    | 14 (1.6%)   | 3.70 (1.90-7.22) | 2.76 (1.36-5.60) |
| 2012-13              | 27 (2.1%)    | 10 (1.1%)   | 3.18 (1.46-6.95) | 2.30 (0.94-5.63) |
| 2013-14              | 69 (5.4%)    | 52 (5.9%)   | 1.56 (0.99-2.48) | 1.29 (0.77-2.18) |
| 2014-15              | 151 (11.9%)  | 52 (5.9%)   | 3.42 (2.23-5.26) | 3.29 (2.05-5.28) |
| 2015-16              | 120 (9.5%)   | 31 (3.5%)   | 4.56 (2.79-7.45) | 4.40 (2.56-7.55) |
| 2016-17              | 216 (17.0%)  | 135 (15.4%) | 1.89 (1.31-2.71) | 1.53 (1.01-2.32) |
| 2017-18              | 335 (26.4%)  | 248 (28.3%) | 1.59 (1.14-2.22) | 1.41 (0.96-2.06) |
| 2018-19              | 209 (16.5%)  | 226 (25.8%) | 1.09 (0.77-1.54) | 0.95 (0.64-1.40) |
| 2019-20              | 84 (6.6%)    | 99 (11.3%)  | Ref.             | Ref.             |

Abbreviations: ARDS: acute respiratory distress syndrome. CI: confidence interval. CKD: chronic kidney disease . CLD: chronic liver disease. COPD: chronic obstructive pulmonary disease. CVD: cardiovascular disease. ICU: intensive care unit. OR: odds ratio.
